# Supplementary material for: The Value of Immune-Related Genes Signature in Osteosarcoma Based on Weighted Gene Co-expression Network Analysis
Source: Hindawi journal article supplement (doi:10.1155/2021/9989321), 2021-05-14
Supplement: f1 [file 9989321.f1.docx]

**Table S1: The sequences of primers used for qRT-PCR**

| **Gene Name** | **Primer Sequences (5’-3’)** | **Annealing temperature** |
| --- | --- | --- |
| *EVI2B* | F: AAGCAGTCACAGCCTACCTTA | 59℃ |
|  | R: TGAATTGTGTTGGTTGACCCAAA |  |
| *GAPDH* | F: AATCCCATCACCATCTTCC | 55℃ |
|  | R: CATCACGCCACAGTTTCC |  |

Note: F is forward primer; R is reverse primer.
